# Supplementary material
Source: ML conference proceedings conference paper supplement (https://openreview.net/forum?id=QM9TStvQgB)
Supplement: supplementary_material [file attachment]

---

# Large-batch Optimization for Dense Visual Predictions

---

Anonymous Author(s)

Affiliation

Address

email

## 1 A Appendix

2 For presenting the details in appendix, we extend the notations as: given a module set  $\mathcal{M}$ ,  
3 e.g.,  $\mathcal{M} = \{\text{Backbone, FPN, RPN, Detection head}\}$  for Faster R-CNN, we define  $w =$   
4  $\{w^{(i)} \mid i \in [1, h]\}$  as the weights of it, where  $h$  means the number of modules in  $\mathcal{M}$  and  $w^{(i)}$   
5 indicates the learnable parameters of  $i$ -th module. Let  $w \in \mathbb{R}^d$ ,  $w^{(i)} \in \mathbb{R}^{d_i}$ , and  $\sum_{i=1}^h d_i = d$ . Given  
6 a dataset  $S = \{(x_i, y_i)\}_{i=1}^n$  with  $n$  training samples, where  $x_i$  and  $y_i$  denote a data point and its  
7 label respectively, we can estimate a loss function  $L : \mathbb{R}^d \rightarrow \mathbb{R}$  for a random sampled mini-batch  
8  $S_t$  to obtain  $l(w_t) = \frac{1}{b} \sum_{j \in S_t} L(w_t, (x_j, y_j))$ , where  $S_t$  is the mini-batch samples with batch size  
9  $|S_t| = b$  at the  $t$ -th iteration. At the  $t$ -th backward propagation step, we can derive the gradient  
10  $\nabla_i l(w_t)$  to update  $i$ -th module in  $\mathcal{M}$ . Keep this in mind, we further formulate the gradient of full  
11 batch (total samples in  $S$ ) as  $\nabla f(w_t)$ , where  $\nabla f(w_t) = \frac{1}{n} \sum_{j \in S} \nabla L(w_t, (x_j, y_j))$ . Naturally, we  
12 have  $\mathbb{E}[\nabla_i l(w_t)] = \nabla_i f(w_t)$ . For convenience, we use  $g_t, \|\cdot\|$  and  $\|\cdot\|_1$  to denote  $\nabla l(w_t)$ ,  $l_2$ -norm  
13 and  $l_1$ -norm, respectively. In particular,  $g_t^{(i)}$  is used to denote  $\nabla_i l(w_t)$ .

### 14 A.1 Gradient Variance Estimation

15 We introduce the gradient variance to measure the gap between SGD (stochastic gradient descent with  
16 mini-batch) and GD (gradient descent with full batch). However, computing the accurate gradient  
17 variance requires extremely high computational cost and it will slow down training speed dramatically.  
18 To address this problem, Qin et al. [1] utilize the cosine similarity between two aggregated gradients  
19 from the replicas in a distributed training system to estimate the gradient variance between SGD  
20 and GD efficiently. Specifically, we can compute the gradient for each sample in the  $t$ -th mini-batch  
21  $S_t$  of batch size  $b$ , denoted by  $r_{1,t}, \dots, r_{j,t}, \dots, r_{b,t}$ , then we have  $g_t = \frac{1}{b} \sum_{j=1}^b r_{j,t}$ . Since we split  
22 the above gradients into two groups, averaging each group can obtain  $G_{t,1} = \frac{2}{b} \sum_{j=1}^{\frac{b}{2}} r_{2j-1,t}$  and  
23  $G_{t,2} = \frac{2}{b} \sum_{j=1}^{\frac{b}{2}} r_{2j,t}$ , respectively. It formulates the gradient variance as:

$$\text{Var}(g_t) = \mathbb{E}[\|g_t - \nabla f(w_t)\|^2] = \frac{n-b}{2n-b} (1 - \mathbb{E}[\cos(G_{t,1}, G_{t,2})]) \mathbb{E}[\|g_t\|^2], \quad (1)$$

24 where  $n$  and  $b$  are the number of training samples and the mini-batch size, respectively. Then we  
25 derive a updated (considering learning rate) gradient variance to delve into the difference of network  
26 modules in complicated dense visual prediction pipelines. The updated gradient variance of the  $i$ -th  
27 network module at the  $t$ -th iteration can be formulated as:

$$\text{Var}(\eta_t g_t^{(i)}) = \mathbb{E}[\|\eta_t g_t^{(i)} - \eta_t \nabla_i f(w_t)\|^2] = \frac{n-b}{2n-b} \underbrace{\eta_t^2 (1 - \mathbb{E}[\cos(G_{t,1}^{(i)}, G_{t,2}^{(i)})])}_{\Phi_t^{(i)}} \mathbb{E}[\|g_t^{(i)}\|^2], \quad (2)$$

28 where  $\eta_t$  is the learning rate.  $G_{t,1}^{(i)}$  and  $G_{t,2}^{(i)}$  are two groups of the gradient es-  
29 timation as discussed above for  $i$ -th submodule. Following [1, 2], since each en-  
30 try in the vector  $g_t^{(i)}$  could be assumed independent and identically distributed (*i.i.d.*)

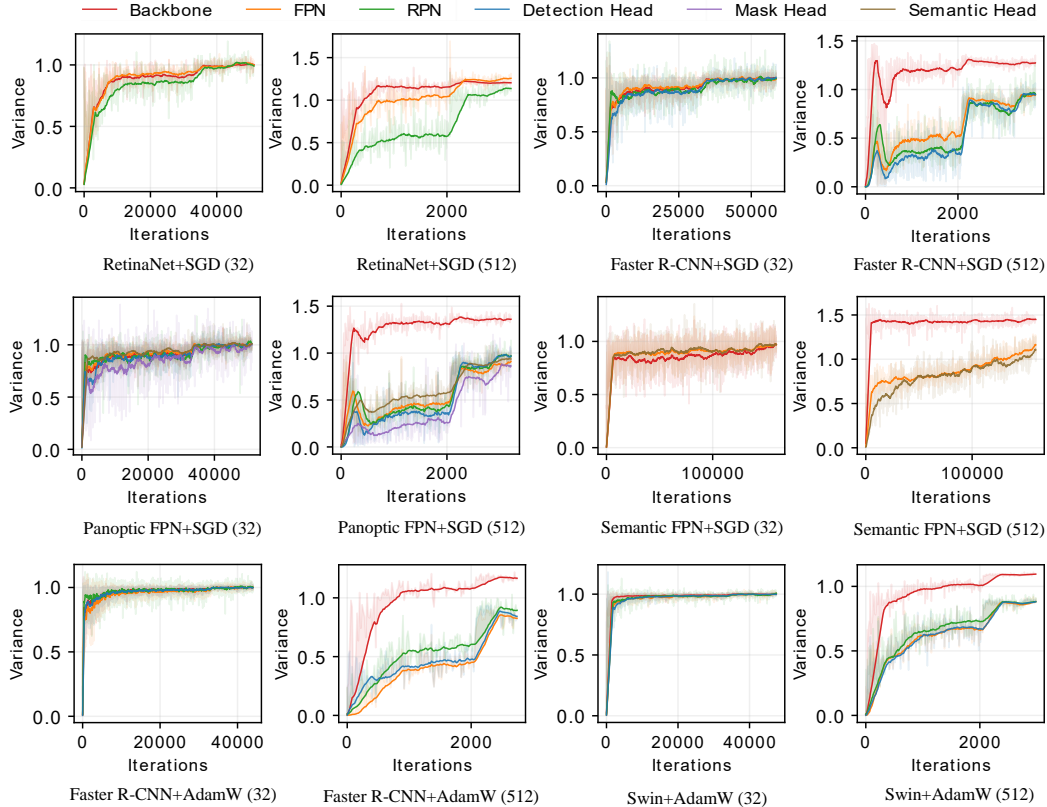

Figure 1: **Comparisons** of the gradient variances (omitting the learning rate  $\eta_t$  referring to Eq. (2)) in different modules of different pipelines (*i.e.*, RetinaNet, Faster R-CNN, Semantic FPN, and Panoptic FPN) and optimizers (*i.e.*, SGD and AdamW). The number in the bracket represents the batch size. We see that when the batch size is small (*i.e.*, 32), the gradient variances are similar. When the batch size is large (*i.e.*, 512), the gradient variances all suffer significant misalignment of different modules. “RPN” in the first two figures of the first row indicates the “Detection Head” in RetinaNet. All pipelines use ResNet50 as the backbone network other than the last two figures, where we adopt Faster R-CNN+Swin-Tiny to visualize the variances.

31 in a massive dataset,  $\Phi_t^{(i)}$  is thus propor-  
 32 tional to the above updated gradient variance.  
 33 At each training iteration, we can approxi-  
 34 mate the updated gradient variance by  $\Phi_t^{(i)} =$   
 35  $\eta_t^2(1 - \cos(G_{t,1}^{(i)}, G_{t,2}^{(i)}))$ , where  $\Phi_t^{(i)}$  indicates  
 36 the  $\text{Var}(\eta_t g_t^{(i)})$  normalized by the number of  
 37 parameters. For consistency of presentation, we  
 38 still call  $\Phi_t^{(i)}$  gradient variance, which enables  
 39 us to estimate the gradient variance of each net-  
 40 work module at each training iteration. Note that  
 41 gradient variance magnitude has great influence  
 42 on the generalization ability of deep neural network [2].

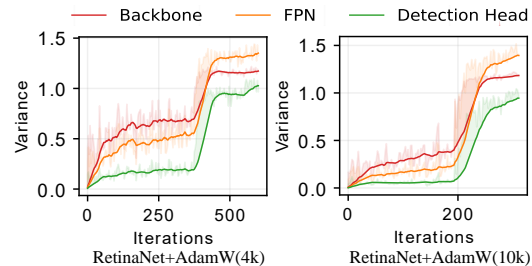

Figure 2: Comparisons of variances for RetinaNet with batch size 4k and 10k.

## 43 A.2 Overview of Gradient Variance of Different Pipelines

44 In this section, we give an overview of the gradient variance comparisons of different pipelines in  
 45 Fig. 1, including four pipelines (*i.e.*, RetinaNet, Faster R-CNN, Semantic FPN, and Panoptic FPN)  
 46 and two optimizers (*i.e.*, SGD and AdamW). We also show the gradient variances with batch size 4k  
 47 and 10k in Fig. 2.

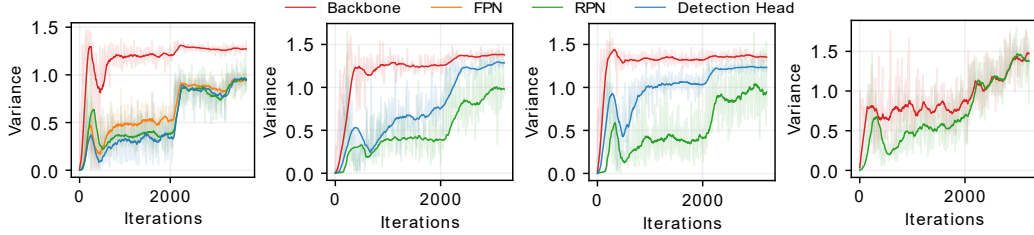

Figure 3: **Ablative experiments on exploring the gradient variance misalignment.** To validate our result on effective batch size, we progressively remove the FPN, decrease region proposals, and freeze the parameters of detection head to reduce the effective batch size. Finally, it also leads to a variance convergence trend throughout the training between RPN and backbone.

### 48 A.3 Ablation Study of Variance Misalignment on Faster R-CNN

49 We define the module set  $\mathcal{M}$  as {Backbone, FPN, RPN, Detection head} in Faster R-CNN [3] and  
 50  $|B_i|$  indicates the *effective batch size* of the  $i$ -th module in  $\mathcal{M}$ . Intuitively, there are  $|B_4| \approx NK|B_1|$   
 51 due to the shared detection head (i.e., classifiers/regressors) by all levels of the FPN and different  
 52 region proposals.  $N$  and  $K$  indicate the number of FPN levels and region proposals fed into the  
 53 detection head. To evaluate this assumption, as shown in Fig. 3, we have three observations. (1)  
 54 Similar to the ablation study on RetinaNet, we remove the FPN and adopt the final level to perform  
 55 detection. As illustrated by the second figure in Fig. 3, the gradient misalignment phenomenon  
 56 between detection head and backbone has been reduced. (2) Furthermore, we reduce the number  
 57 of region proposals from 512 to 10. As shown in the third figure in Fig. 3, this also alleviates the  
 58 variance difference between detection head and backbone. (3) Finally, we freeze the parameters in  
 59 the detection head and only train RPN and backbone. Similar to the phenomenon on RetinaNet, this  
 60 also leads to a variance convergence trend throughout the training between RPN and backbone.

### 61 A.4 Proof of Convergence Rate

62 In this section, we will show that even using AGVM, SGD and AdamW optimizers still enjoy  
 63 appealing convergence properties. In order to present our analysis, we first need to make some  
 64 assumptions.

65 **Assumptions.** We need to assume function  $f(w)$  is  $L_i$ -smooth with respect to  $w^{(i)}$ , i.e., there  
 66 exists a constant  $L_i$  such that:

$$\forall x, y \in \mathbb{R}^d, \|\nabla_i f(x) - \nabla_i f(y)\| \leq L_i \|x^{(i)} - y^{(i)}\|, \quad (3)$$

67 for all  $i \in [1, h]$ . We use  $L = (L_1, \dots, L_h)^\top$  to denote the  $h$ -dimensional vector of Lipschitz  
 68 constants and use  $L_{max}$  to denote  $\max_i L_i$ . We also assume the following bound on different  
 69 modules' gradient norm via  $\mathbb{E}[\|g^{(i)}\|^2] \leq K\|\nabla_1 f(w)\|^2$ . Furthermore, although it's difficult to  
 70 quantify the effective batch size of different modules, we argue the ratio of effective batch size  
 71 between different modules should be bounded, so we can assume  $1 \leq \frac{\mathbb{E}[\|\Phi_t^{(1)}\|]}{\mathbb{E}[\|\Phi_t^{(i)}\|]} \leq \alpha_u$  for  $i \in [1, h]$   
 72 and  $t \in [1, T]$ . For the sake of simplicity, we give convergence results when  $\beta_1 = 0$  and ignore the  
 73 weight decay coefficient ( $\lambda = 0$ ). However, our analysis should extend to the general case as well.  
 74 We leave this investigation in future work.

#### 75 A.4.1 Convergence of AGVM+SGD

76 For SGD optimizer, we also assume the following bound on the variance in stochastic gradients  
 77  $\mathbb{E}\|g^{(i)} - \nabla_i f(w)\|^2 \leq \sigma_i^2$  for all  $w \in \mathbb{R}^d$  and  $i \in [1, h]$  with effective batch size  $B_i$ . For component  
 78  $i$ , we have the following update for SGD optimizer:

$$w_{t+1}^{(i)} = w_t^{(i)} - \eta_t \sqrt{\frac{\mathbb{E}[\|\Phi_t^{(1)}\|]}{\mathbb{E}[\|\Phi_t^{(i)}\|]}} g_t^{(i)}. \quad (4)$$

79 Since the function  $f$  is  $L_i$  - smooth, we can obtain the following inequality:

$$f(w_{t+1}) \leq f(w_t) + \left\langle \nabla_i f(w_t), w_{t+1}^{(i)} - w_t^{(i)} \right\rangle + \sum_{i=1}^h \eta_t^2 \frac{L_i}{2} \frac{\mathbb{E}[\|\Phi_t^{(1)}\|]}{\mathbb{E}[\|\Phi_t^{(i)}\|]} \|g_t^{(i)}\|^2. \quad (5)$$

80 Then, we will first give some analysis on the following ratio:

$$\frac{\mathbb{E}[\|\Phi_t^{(1)}\|]}{\mathbb{E}[\|\Phi_t^{(i)}\|]} = \frac{\mathbb{E}\left[1 - \cos(G_{t,1}^{(1)}, G_{t,2}^{(1)})\right]}{\mathbb{E}\left[1 - \cos(G_{t,1}^{(i)}, G_{t,2}^{(i)})\right]}. \quad (6)$$

81 As shown in Fig. 1, when the batch size is relatively small (e.g., less than 2k), we have  
82  $\cos(G_{t,1}^{(1)}, G_{t,2}^{(1)}) \rightarrow 0$ . Based on this, we have the following:

$$\frac{\mathbb{E}\left[1 - \cos(G_{t,1}^{(1)}, G_{t,2}^{(1)})\right]}{\mathbb{E}\left[1 - \cos(G_{t,1}^{(i)}, G_{t,2}^{(i)})\right]} \leq \frac{\mathbb{E}\left[\cos(G_{t,1}^{(i)}, G_{t,2}^{(i)})\right]}{\mathbb{E}\left[\cos(G_{t,1}^{(1)}, G_{t,2}^{(1)})\right]}. \quad (7)$$

83 By displaying  $\delta_t \equiv g_t^{(i)} - \nabla_i f(w_t)$ , we obtain:

$$\mathbb{E}\left[\|g_t^{(i)}\|^2\right] = \mathbb{E}\left[\|\delta_t + \nabla_i f(w_t)\|^2\right] = \sigma_i^2 + \|\nabla_i f(w_t)\|^2. \quad (8)$$

84 Following the Eq.(6) in [1], we have:

$$\frac{\|\nabla_i f(w_t)\|^2}{\|\nabla_i f(w_t)\|^2 + \sigma_i^2} = \frac{\|\nabla_i f(w_t)\|^2}{\mathbb{E}\left[\|g_t^{(i)}\|^2\right]} = \mathbb{E}\left[\cos(G_{t,1}^{(i)}, G_{t,2}^{(i)})\right] \leq 1. \quad (9)$$

85 With the help of above inequality, we have:

$$\frac{\mathbb{E}\left[\cos(G_{t,1}^{(i)}, G_{t,2}^{(i)})\right]}{\mathbb{E}\left[\cos(G_{t,1}^{(1)}, G_{t,2}^{(1)})\right]} \leq 1 + \frac{\sigma_1^2}{\|\nabla_1 f(w_t)\|^2}. \quad (10)$$

86 However, as shown in Fig. 2, when the batch size is extremely large (e.g., larger than 4k), we cannot  
87 derive the above equation. In this case, we have:

$$\frac{\mathbb{E}\left[1 - \cos(G_{t,1}^{(1)}, G_{t,2}^{(1)})\right]}{\mathbb{E}\left[1 - \cos(G_{t,1}^{(i)}, G_{t,2}^{(i)})\right]} \leq 1 + \alpha_0 + \frac{\sigma_1^2}{\|\nabla_1 f(w_t)\|^2}, \quad (11)$$

88 where  $\alpha_0$  is a constant that meets  $\alpha_u - 1 - \frac{\sigma_1^2}{\|\nabla_1 f(w_t)\|^2} \leq \alpha_0 \leq \alpha_u - 1$  for all  $t \leq T$ . Then by  
89 adding Eq. (11) to Eq. (5), we obtain:

$$f(w_{t+1}) \leq f(w_t) + \left\langle \nabla_i f(w_t), w_{t+1}^{(i)} - w_t^{(i)} \right\rangle + \sum_{i=1}^h \eta_t^2 \frac{L_i}{2} \left( \alpha_0 + 1 + \frac{\sigma_1^2}{\|\nabla_1 f(w_t)\|^2} \right) \|g_t^{(i)}\|^2. \quad (12)$$

90 Taking expectation on the both side, according to the assumption on Eq. (6), we have:

$$\begin{aligned} \mathbb{E}[f(w_{t+1})] &\leq f(w_t) - \eta_t \sum_{i=1}^h \|\nabla_i f(w_t)\|^2 + \sum_{i=1}^h \eta_t^2 \frac{L_i}{2} \left( \alpha_0 + 1 + \frac{\sigma_1^2}{\|\nabla_1 f(w_t)\|^2} \right) \mathbb{E}\left[\|g_t^{(i)}\|^2\right] \\ &\leq f(w_t) - \eta_t \sum_{i=1}^h \|\nabla_i f(w_t)\|^2 + \sum_{i=1}^h \eta_t^2 \frac{L_i}{2} \left( (1 + \alpha_0) \mathbb{E}\left[\|g_t^{(i)}\|^2\right] + K\sigma_1^2 \right) \\ &\leq f(w_t) - \eta_t \sum_{i=1}^h \|\nabla_i f(w_t)\|^2 + \sum_{i=1}^h \eta_t^2 \frac{L_i}{2} \left( (1 + \alpha_0)(\sigma_i^2 + \|\nabla_i f(w_t)\|^2) + K\sigma_1^2 \right) \\ &\leq f(w_t) - \sum_{i=1}^h \left( \eta_t - \frac{L_{max}}{2} (1 + \alpha_0) \eta_t^2 \right) \|\nabla_i f(w_t)\|^2 + \sum_{i=1}^h \eta_t^2 \frac{L_i}{2} (K\sigma_1^2 + (1 + \alpha_0)\sigma_i^2). \end{aligned} \quad (13)$$

91 Summing both sides of this inequality and taking the complete expectation, we get:

$$\begin{aligned} \mathbb{E}[f(w_{t+1})] &\leq f(w_1) \\ &\quad - \sum_{t=1}^T \sum_{i=1}^h \left( \eta_t - \frac{L_{max}}{2} \eta_t^2 (1 + \alpha_0) \right) \mathbb{E}[\|\nabla_i f(w_t)\|^2] + T \sum_{i=1}^h \eta_t^2 \frac{L_i}{2} (K\sigma_1^2 + (1 + \alpha_0)\sigma_i^2). \end{aligned} \quad (14)$$

92 Define  $f_{inf} = \inf f(w_t)$  and arrange the above inequality, we can get:

$$\frac{1}{T} \sum_{t=1}^T \sum_{i=1}^h \mathbb{E}[\|\nabla_i f(w_t)\|^2] \leq \frac{f(w_1) - f_{inf}}{T \left( \eta_t - \frac{L_{max}}{2} \eta_t^2 (1 + \alpha_0) \right)} + \frac{\sum_{i=1}^h \eta_t L_i (K\sigma_1^2 + (1 + \alpha_0)\sigma_i^2)}{2 - L_{max} \eta_t (1 + \alpha_0)}. \quad (15)$$

93 Let  $\eta_t \leq \frac{1}{(1 + \alpha_0)L_{max}}$ , we have the following bound:

$$\frac{1}{T} \sum_{t=1}^T \mathbb{E}[\|\nabla f(w_t)\|^2] \leq \frac{2(f(w_1) - f_{inf})}{T \eta_t} + \sum_{i=1}^h \eta_t L_i (K\sigma_1^2 + (1 + \alpha_0)\sigma_i^2). \quad (16)$$

#### 94 A.4.2 Convergence of AGVM+AdamW

95 For AdamW optimizer, we also assume  $\|g_t\|_\infty \leq G - \sqrt{\epsilon}$ ,  $d_i = \frac{d}{h}$ . Following [4], we rewrite the  
 96 learning rate in the following manner:  $\tilde{\eta}_t = \eta_t \sqrt{\frac{1 - \beta_2^t}{1 - \beta_2}}$ . Based on this, we can redefine the  $v_t$  as  
 97  $v_t = \beta_2 v_{t-1} + g_t^2$ , and let  $\tilde{v}_t = \beta_2 v_{t-1} + \mathbb{E}[g_t^2]$ . So the update of original AdamW can be given  
 98 by:  $r_t = \frac{g_t}{\sqrt{v_t + \epsilon}}$ , then we have the following update for AGVM+AdamW:

$$w_{t+1}^{(i)} = w_t^{(i)} - \tilde{\eta}_t \sqrt{\frac{\mathbb{E}[\|\Phi_t^{(1)}\|]}{\mathbb{E}[\|\Phi_t^{(i)}\|]}} r_t^{(i)}. \quad (17)$$

99 Since the function  $f$  is  $L_i$ -smooth, we have the following:

$$f(w_{t+1}) \leq f(w_t) + \left\langle \nabla_i f(w_t), w_{t+1}^{(i)} - w_t^{(i)} \right\rangle + \sum_{i=1}^h \tilde{\eta}_t^2 \frac{L_i}{2} \frac{\mathbb{E}[\|\Phi_t^{(1)}\|]}{\mathbb{E}[\|\Phi_t^{(i)}\|]} \|r_t^{(i)}\|^2. \quad (18)$$

100 For any component  $i$ , we have:

$$\mathbb{E} \left[ \cos(G_{t,1}^{(i)}, G_{t,2}^{(i)}) \right] = \frac{\sum_{j=0}^{d_i} (\mathbb{E} \left[ g_{t,j}^{(i)} / \sqrt{\epsilon + v_{t,j}^{(i)}} \right])^2}{\sum_{j=0}^{d_i} \mathbb{E} \left[ (g_{t,j}^{(i)} / \sqrt{\epsilon + v_{t,j}^{(i)}})^2 \right]} \leq 1, \quad (19)$$

101 where  $g_{t,j}^{(i)}$  and  $v_{t,j}^{(i)}$  denote the  $j$ -th entry of  $g_t^{(i)}$  and  $v_t^{(i)}$ . Thanks to the  $l_\infty$  bound on  $g_t$ , we have  
 102  $g_t^{(i)} \leq \sqrt{\epsilon + v_{t,j}^{(i)}} \leq \frac{G}{\sqrt{1 - \beta_2}}$ , so that:

$$\frac{\|\nabla_i f(w_t)\|^2}{d_i(G^2/(1 - \beta_2))} \leq \frac{\sum_{j=0}^{d_i} (\mathbb{E} \left[ g_t^{(i)} / \sqrt{\epsilon + v_{t,j}^{(i)}} \right])^2}{\sum_{j=0}^{d_i} \mathbb{E} \left[ (g_t^{(i)} / \sqrt{\epsilon + v_{t,j}^{(i)}})^2 \right]} \leq 1. \quad (20)$$

103 Similar to Eq. (7), then we get:

$$\frac{\mathbb{E} \left[ 1 - \cos(G_{t,1}^{(1)}, G_{t,2}^{(1)}) \right]}{\mathbb{E} \left[ 1 - \cos(G_{t,1}^{(i)}, G_{t,2}^{(i)}) \right]} \leq \frac{\mathbb{E} \left[ \cos(G_{t,1}^{(i)}, G_{t,2}^{(i)}) \right]}{\mathbb{E} \left[ \cos(G_{t,1}^{(1)}, G_{t,2}^{(1)}) \right]} \leq \frac{d_1(G^2/(1 - \beta_2))}{\|\nabla_1 f(w_t)\|^2}. \quad (21)$$

104 However, since  $1 - \beta_2 \rightarrow 0$  in general AdamW settings, and for some extremely large batch size, we  
 105 have:

$$\frac{\mathbb{E} \left[ 1 - \cos(G_{t,1}^{(1)}, G_{t,2}^{(1)}) \right]}{\mathbb{E} \left[ 1 - \cos(G_{t,1}^{(i)}, G_{t,2}^{(i)}) \right]} \leq \min \left\{ \frac{d_1(G^2/(1 - \beta_2))}{\|\nabla_1 f(w_t)\|^2}, \alpha_u \right\}. \quad (22)$$

106 We will give the convergence bounds using these two items, respectively. For the first item, by  
107 rewriting Lemma 1 in [4], we get:

$$\mathbb{E} \left[ \nabla_{i,j} f(w_t) \frac{g_{t,j}^{(i)}}{\sqrt{\epsilon + v_{t,j}^{(i)}}} \right] \geq \frac{(\nabla_{i,j} f(w_t))^2}{2\sqrt{\epsilon + \tilde{v}_{t,j}^{(i)}}} - 2G \mathbb{E} \left[ \frac{(g_{t,j}^{(i)})^2}{\epsilon + v_{t,j}^{(i)}} \right], \quad (23)$$

108 where we denote the  $j$ -th entry of  $\nabla_i f(w_t)$  by  $\nabla_{i,j} f(w_t)$ . Thanks to the  $l_\infty$  bounded on  $g^{(i)}$ , we  
109 have:

$$\tilde{\eta}_t \frac{(\nabla_{i,j} f(w_t))^2}{2\sqrt{\epsilon + \tilde{v}_{t,j}^{(i)}}} \geq \frac{\eta_t (\nabla_{i,j} f(w_t))^2}{2G}. \quad (24)$$

110 Taking expectation on Eq. (18), and adding Eq. (24) to Eq. (18), we have:

$$\begin{aligned} \mathbb{E}[f(w_{t+1})] &\leq f(w_t) \\ &\quad - \frac{\eta_t}{2G} \|\nabla f(w_t)\|^2 + \sum_{i=1}^h \left( 2\tilde{\eta}_t G + \frac{\tilde{\eta}_t^2 L_i d_1 (G^2 / (1 - \beta_2))}{2\|\nabla_1 f(w_t)\|^2} \right) \mathbb{E} \left[ \|r_t^{(i)}\|^2 \right]. \end{aligned} \quad (25)$$

111 Taking complete expectation on Eq. (25) and sum up:

$$\begin{aligned} \mathbb{E}[f(w_{t+1})] &\leq f(w_1) - \frac{\eta_t}{2G} \sum_{t=1}^T \mathbb{E} [\|\nabla f(w_t)\|^2] \\ &\quad + \sum_{t=1}^T \sum_{i=1}^h \left( \frac{2\eta_t G}{\sqrt{1 - \beta_2}} \mathbb{E} \left[ \|r_t^{(i)}\|^2 \right] \right) + \frac{\eta_t^2 \|L\|_1 d_1 (G^2 / (1 - \beta_2)) K T}{2\epsilon(1 - \beta_2)}. \end{aligned} \quad (26)$$

112 Then, with the help of Lemma 2 in [4], we get:

$$\begin{aligned} \mathbb{E}[f(w_{t+1})] &\leq f(w_1) - \frac{\eta_t}{2G} \sum_{t=1}^T \mathbb{E} [\|\nabla f(w_t)\|^2] \\ &\quad + \frac{2\eta_t G d}{\sqrt{1 - \beta_2}} \left( \frac{1}{T} \ln \left( 1 + \frac{G^2}{(1 - \beta_2)\epsilon} \right) - T \ln(\beta_2) \right) + \frac{\eta_t^2 \|L\|_1 d_1 (G^2 / (1 - \beta_2)) K T}{2\epsilon(1 - \beta_2)}. \end{aligned} \quad (27)$$

113 For the second item in Eq. (22), taking complete expectation on Eq. (18) and sum up:

$$\begin{aligned} \mathbb{E}[f(w_{t+1})] &\leq f(w_1) \\ &\quad - \frac{\eta_t}{2G} \sum_{t=1}^T \mathbb{E} [\|\nabla f(w_t)\|^2] + \sum_{t=1}^T \sum_{i=1}^h \left( \left( \frac{2\eta_t G}{\sqrt{1 - \beta_2}} + \tilde{\eta}_t^2 \alpha_u \frac{L_i}{2} \right) \mathbb{E} \left[ \|r_t^{(i)}\|^2 \right] \right). \end{aligned} \quad (28)$$

114 With the help of Lemma 2 in [4], we get:

$$\begin{aligned} \mathbb{E}[f(w_{t+1})] &\leq f(w_1) - \frac{\eta_t}{2G} \sum_{t=1}^T \mathbb{E} [\|\nabla f(w_t)\|^2] \\ &\quad + \left( \frac{2\eta_t G d}{\sqrt{1 - \beta_2}} + \tilde{\eta}_t^2 \alpha_u h \frac{\|L\|_1}{2} \right) \left( \frac{1}{T} \ln \left( 1 + \frac{G^2}{(1 - \beta_2)\epsilon} \right) - T \ln(\beta_2) \right). \end{aligned} \quad (29)$$

115 Finally, we have:

$$\begin{aligned} \frac{1}{2GT} \sum_{t=1}^T \mathbb{E} [\|\nabla f(w_t)\|^2] &\leq \frac{f(w_1) - f_{inf}}{\eta_t T} + \frac{2Gd}{\sqrt{1 - \beta_2}} \left( \frac{1}{T} \ln \left( 1 + \frac{G^2}{(1 - \beta_2)\epsilon} \right) - \ln(\beta_2) \right) + C, \\ C &= \min \left\{ \frac{\eta_t \|L\|_1 d G^2 K}{2\epsilon h (1 - \beta_2)^2}, \frac{\eta_t \alpha_u h \|L\|_1}{2(1 - \beta_2)} \left( \frac{1}{T} \ln \left( 1 + \frac{G^2}{(1 - \beta_2)\epsilon} \right) - \ln(\beta_2) \right) \right\}. \end{aligned} \quad (30)$$

116 For AGVM+SGD, suppose  $\eta_t = \frac{1}{\sqrt{T}}$ , and for AGVM+AdamW, let  $\eta_t = \frac{1}{\sqrt{T}}$  and  $\beta_2 = 1 - \frac{1}{T}$ , then  
117 SGD and AdamW achieve  $O(1/\sqrt{T})$  and  $O(\ln(T)/\sqrt{T})$  convergence rate, respectively. Note that in  
118 this case, the upper bound of Eq. (30) is dominated by the second item of  $C$ .

119 **A.5 Parameter Settings**

120 **A.5.1 Settings for Different Visual Predictors**

121 In this section, we give the detailed hyper-parameter settings for the training of different visual  
 122 predictors, which are shown in Table 1, Table 2 and Table 3. All predictors are evaluated on the  
 123 **validation set** of COCO and ADE20K dataset. For SGD optimizer, we do not follow the linear  
 124 learning rate scaling in [5] since the large learning rate on batch size 512 leads to the training failure  
 125 of baseline. Instead, when the batch size is greater than 128 (256 for semantic segmentation), we  
 126 use the square root of learning rate scaling to avoid divergence in the training process. With this  
 127 strategy, we obtain a better baseline than [5]. For AdamW optimizer, the learning rate scaling strategy  
 128 is almost the same as SGD. The only difference is that we adopt a smoother scaling scheme due to its  
 129 faster convergence speed. Specifically, when the batch size is greater than 128, the learning rate is  
 130 scaled up with a ratio of  $\sqrt{1.5}$  if we double the batch size.

Table 1: Hyper-parameter settings for SGD optimizer on Faster R-CNN, Mask R-CNN, and Panoptic FPN with the CNN backbone. LR represents the global learning rate.

| Batch Size | Warmup Epochs | LR    | LR Decay  | $\tau$ | $\alpha$ | Weight Decay |
|------------|---------------|-------|-----------|--------|----------|--------------|
| 32         | 1             | 0.04  | MultiStep | 10     | 0.97     | 1e-4         |
| 256        | 2             | 0.226 | MultiStep | 10     | 0.97     | 1e-4         |
| 512        | 2             | 0.32  | MultiStep | 10     | 0.97     | 1e-4         |
| 1024       | 2             | 0.452 | MultiStep | 5      | 0.97     | 1e-4         |

Table 2: Hyper-parameter settings for SGD optimizer on Semantic FPN with the CNN backbone. LR represents the global learning rate. "Poly" means that the learning rate at current iteration is multiplied by  $(1 - \frac{iter}{max\_iter})^{power}$  (with  $power = 0.9$ ).

| Batch Size | Warmup Iters | LR    | LR Decay | $\tau$ | $\alpha$ | Weight Decay |
|------------|--------------|-------|----------|--------|----------|--------------|
| 32         | 500          | 0.01  | Poly     | 5      | 0.97     | 5e-4         |
| 512        | 500          | 0.113 | Poly     | 5      | 0.97     | 5e-4         |
| 1024       | 250          | 0.16  | Poly     | 5      | 0.97     | 5e-4         |
| 2048       | 125          | 0.226 | Poly     | 5      | 0.97     | 5e-4         |

Table 3: Hyper-parameter settings for AdamW optimizer on Faster R-CNN with the Tranformer backbone. LR represents the global learning rate.

| Batch Size | Warmup Epochs | LR     | LR Decay  | $\tau$ | $\alpha$ | Weight Decay | Gradient Clip |
|------------|---------------|--------|-----------|--------|----------|--------------|---------------|
| 32         | 1             | 2e-4   | MultiStep | 10     | 0.97     | 0.05         | -             |
| 256        | 2             | 9.8e-4 | MultiStep | 10     | 0.97     | 0.05         | 1.0           |
| 512        | 2             | 1.2e-3 | MultiStep | 10     | 0.97     | 0.05         | 1.0           |
| 1024       | 3             | 1.5e-3 | MultiStep | 5      | 0.97     | 0.05         | 1.0           |

131 **A.5.2 Setting for Billion-level UniNet**

Table 4: UniNet-G architecture. We adopt the Fused MBCConv blocks [6] and transformer blocks to form a hybrid convolution-transformer visual network.

| Stage | Block         | Expansion | Network Size |        |        |
|-------|---------------|-----------|--------------|--------|--------|
|       |               |           | Channel      | Layers | Stride |
| 0     | Fused MBCConv | 1         | 104          | 6      | 2      |
| 1     | Fused MBCConv | 4         | 216          | 9      | 4      |
| 2     | Fused MBCConv | 6         | 384          | 18     | 8      |
| 3     | Fused MBCConv | 3         | 576          | 18     | 16     |
| 4     | Transformer   | 2         | 576          | 18     | 16     |
| 5     | Transformer   | 5         | 1152         | 36     | 32     |

132 We scale the UniNet [7] to 1-billion parameters and evaluate it on COCO **test-dev** benchmark. The  
 133 detailed architecture is presented in Table 4.

134 **Improved HTC detector.** To compare with the state-of-the-art, we implement some extensions to  
 135 the original HTC [8] and denote it as HTC-X. This improved version is built upon the light-weight  
 136 variant of HTC (HTC-Lite [9]). To reduce the computation overheads, the transformer blocks of  
 137 UniNet-G backbone are evenly split into 18 subsets. There are two blocks using window attention  
 138 and the last block using global attention in each subset. Furthermore, we adopt RCNet [10] and  
 139 SEPC [11] as the feature pyramid with levels from  $P_3$  to  $P_8$ , and increase the feature channel from  
 140 256 to 384. The positive IoU thresholds in the R-CNN stage are increased to 0.6, 0.7, 0.8. We use 4  
 141 decoupled transformer blocks for the classification branch and localization branch, respectively.

142 **ImageNet-22K pre-training.** We train the UniNet-G for 150 epochs using AdamW optimizer and  
 143 a cosine learning rate scheduler. The peak learning rate is 0.005 and the minimum learning rate is  
 144 0.0001. A batch size of 5120 and a weight decay of 0.03 are used. We adopt common augmentation  
 145 techniques including Mixup, Cutmix, Random Erasing, and stochastic depth with a ratio of 0.3.

146 **Finetuning on COCO object detection.** We first finetune the improved HTC-X (without the mask  
 147 branch) on the Objects-365 V1 dataset [12], which consists of 638k images. The model is trained  
 148 with an AdamW optimizer with a learning rate of  $8e - 5$  and a batch size of 64 for 20 epochs. Then  
 149 we further finetune it on COCO dataset for only 11 epochs. A batch size of 960 and a learning rate of  
 150  $1.5e - 4$  are adopted. During the finetuning phase, the shorter side of the input image is randomly  
 151 selected between 400 and 1200 while the longer side is at most 1600. The window sizes of UniNet-G  
 152 are set to  $28 \times 28$  for Stage 4 and  $14 \times 14$  for Stage 5.

## 153 A.6 Overview of AGVM-enabled SGD and AdamW

154 We treat the Backbone ( $i = 1$ ) as the anchor and modulate other modules making their gradient  
 155 variances consistent with the Backbone. Specifically, we adjust the module learning rates  $\hat{\eta}_t^{(i)}$  by  
 156 using the ratio between  $\Phi_t^{(1)}$  and  $\Phi_t^{(i)}$ . The update rule for each network module can be written as:

$$w_{t+1}^{(i)} = w_t^{(i)} - \hat{\eta}_t^{(i)} g_t^{(i)}, \text{ where } \hat{\eta}_t^{(i)} = \eta_t \mu_t^{(i)} \text{ and } \mu_t^{(i)} = \sqrt{\frac{\Phi_t^{(1)}}{\Phi_t^{(i)}}}, \quad (31)$$

157 where  $\eta_t$  is the global learning rate. However, simply adjusting the learning rates on-the-fly would  
 158 easily yield training failure due to the transitory large variance ratio that impedes the optimization.  
 159 We propose a momentum update to address this problem. Let  $\alpha \in [0, 1)$  be a momentum coefficient,  
 160 we have:

$$\mu_t^{(i)} \leftarrow \alpha \mu_{t-1}^{(i)} + (1 - \alpha) \mu_t^{(i)}, \quad (32)$$

161 which can reduce the influence of unstable variance. Note that we update  $\mu_t^{(i)}$  each  $\tau$  iterations.  
 162 Based on this, we present AGVM-enabled SGD and AdamW optimizers in Alg.1, and Alg. 2.

## 163 A.7 Related Work on Dense Visual Predictions

164 We can divide current deep learning based object detection into two-stage and single-stage detectors.  
 165 A network that has a separate module to generate region proposals is termed as a two-stage detector.  
 166 These methods try to find an arbitrary number of proposals in an image during the first stage and  
 167 then classify and localize them in the second stage, including Faster R-CNN [3], Mask R-CNN  
 168 [13], R-FCN [14]. Single-stage detectors, such as SSD [15], RetinaNet [16], classify and localize  
 169 semantic objects in a single shot using dense sampling. They use predefined boxes/keypoints of  
 170 various scales and aspect ratios to localize objects. Some single-stage detectors, like FOCS [17]  
 171 can also achieve competitive results as two-stage detectors. In recent years, deep learning models  
 172 have yielded a new generation of image segmentation [18, 19] tasks with significant performance  
 173 improvements. Different from detection tasks, we can group deep learning segmentation based on  
 174 the segmentation goal into semantic segmentation, instance segmentation, and panoptic segmentation.  
 175 Semantic segmentation [20, 21] can be seen as an extension of image classification from image level  
 176 to pixel level. While instance segmentation [13, 22] can be defined as the task of finding simultaneous

---

**Algorithm 1** AGVM+SGD

---

**Input:**  $w_1 \in \mathbb{R}^d$ , learning rate  $\{\eta_t\}_{t=1}^T$ , parameters  $0 \leq \beta_1, \alpha < 1$ , interval  $\tau$ , weight decay coefficient  $\lambda$   
Set  $m_0 = 0, u_0^{(i)} = 1$  for  $i \in [1, h]$   
**for**  $t = 1$  **to**  $T$  **do**  
  Draw  $b$  samples  $S_t$  from dataset  $S$ .  
  Compute  $g_t = \frac{1}{b} \sum_{j \in S_t} \nabla l(w_t, (x_j, y_j))$ .  
  **if**  $t \% \tau = 0$  **then**  
    Compute  $\Phi_t^{(i)}$  via gradients  $g_t^{(i)}$ .  
    Compute  $\hat{\eta}_t^{(i)}$  and  $\mu_t^{(i)}$ .  
  **end if**  
   $m_t = \beta_1 m_{t-1} + (1 - \beta_1)(g_t + \lambda w_t)$   
   $w_{t+1}^{(i)} = w_t^{(i)} - \hat{\eta}_t^{(i)} m_t^{(i)}$   
**end for**

---

**Algorithm 2** AGVM+AdamW

---

**Input:**  $w_1 \in \mathbb{R}^d$ , learning rate  $\{\eta_t\}_{t=1}^T$ , parameters  $0 \leq \beta_1, \beta_2, \alpha < 1$ , interval  $\tau$ , weight decay coefficient  $\lambda$   
Set  $m_0 = 0, v_0 = 0, u_0^{(i)} = 1$  for  $i \in [1, h]$   
**for**  $t = 1$  **to**  $T$  **do**  
  Draw  $b$  samples  $S_t$  from dataset  $S$ .  
  Compute  $g_t = \frac{1}{b} \sum_{j \in S_t} \nabla l(w_t, (x_j, y_j))$ .  
   $m_t = \beta_1 m_{t-1} + (1 - \beta_1) g_t$   
   $v_t = \beta_2 v_{t-1} + (1 - \beta_2) g_t^2$   
  **if**  $t \% \tau = 0$  **then**  
    Compute  $\Phi_t^{(i)}$  via modified gradients  $\frac{g_t^{(i)}}{\sqrt{v_t + \epsilon}}$ .  
    Compute  $\hat{\eta}_t^{(i)}$  and  $\mu_t^{(i)}$ .  
  **end if**  
   $m_t = \frac{m_t}{1 - \beta_1^t}, v_t = \frac{v_t}{1 - \beta_2^t}, r_t = \frac{m_t}{\sqrt{v_t + \epsilon}}$   
   $w_{t+1}^{(i)} = w_t^{(i)} - \hat{\eta}_t^{(i)} (r_t^{(i)} + \lambda w_t^{(i)})$   
**end for**

177 solution to semantic segmentation and object detection. Finally, panoptic segmentation [23, 24, 25]  
178 focus on identifying things and stuff separately, also separate (using different colors) the things of the  
179 same class.

## 180 References

- 181 [1] H. Qin, S. Rajbhandari, O. Ruwase, F. Yan, L. Yang, and Y. He, “Simigrad: Fine-grained  
182 adaptive batching for large scale training using gradient similarity measurement,” in *Advances*  
183 *in Neural Information Processing Systems*, vol. 34, 2021.
- 184 [2] J. Wu, W. Hu, H. Xiong, J. Huan, V. Braverman, and Z. Zhu, “On the noisy gradient descent that  
185 generalizes as sgd,” in *International Conference on Machine Learning*, 2020, pp. 10 367–10 376.
- 186 [3] S. Ren, K. He, R. Girshick, and J. Sun, “Faster r-cnn: Towards real-time object detection with  
187 region proposal networks,” in *Advances in Neural Information Processing Systems*, vol. 28,  
188 2015.
- 189 [4] A. Défossez, L. Bottou, F. Bach, and N. Usunier, “A simple convergence proof of adam and  
190 adagrad,” *arXiv Preprint arXiv:2003.02395*, 2020.
- 191 [5] T. Wang, Y. Zhu, C. Zhao, W. Zeng, Y. Wang, J. Wang, and M. Tang, “Large batch optimization  
192 for object detection: Training coco in 12 minutes,” in *European Conference on Computer Vision*,  
193 2020, pp. 481–496.
- 194 [6] M. Tan and Q. Le, “Efficientnetv2: Smaller models and faster training,” in *International*  
195 *Conference on Machine Learning*, 2021, pp. 10 096–10 106.
- 196 [7] J. Liu, H. Li, G. Song, X. Huang, and Y. Liu, “Uninet: Unified architecture search with  
197 convolution, transformer, and mlp,” *arXiv Preprint arXiv:2110.04035*, 2021.
- 198 [8] K. Chen, J. Pang, J. Wang, Y. Xiong, X. Li, S. Sun, W. Feng, Z. Liu, J. Shi, W. Ouyang *et al.*,  
199 “Hybrid task cascade for instance segmentation,” in *Proceedings of the IEEE/CVF Conference*  
200 *on Computer Vision and Pattern Recognition*, 2019, pp. 4974–4983.
- 201 [9] J. Wang, W. Zhang, Y. Zang, Y. Cao, J. Pang, T. Gong, K. Chen, Z. Liu, C. C. Loy, and  
202 D. Lin, “Seesaw loss for long-tailed instance segmentation,” in *Proceedings of the IEEE/CVF*  
203 *Conference on Computer Vision and Pattern Recognition*, 2021, pp. 9695–9704.
- 204 [10] Z. Zong, Q. Cao, and B. Leng, “Rcnet: Reverse feature pyramid and cross-scale shift network  
205 for object detection,” in *Proceedings of the 29th ACM International Conference on Multimedia*,  
206 2021, pp. 5637–5645.

- 207 [11] X. Wang, S. Zhang, Z. Yu, L. Feng, and W. Zhang, “Scale-equalizing pyramid convolution for  
208 object detection,” in *Proceedings of the IEEE/CVF Conference on Computer Vision and Pattern  
209 Recognition*, 2020, pp. 13 359–13 368.
- 210 [12] S. Shao, Z. Li, T. Zhang, C. Peng, G. Yu, X. Zhang, J. Li, and J. Sun, “Objects365: A large-  
211 scale, high-quality dataset for object detection,” in *Proceedings of the IEEE/CVF International  
212 Conference on Computer Vision*, 2019, pp. 8430–8439.
- 213 [13] K. He, G. Gkioxari, P. Dollár, and R. Girshick, “Mask r-cnn,” in *Proceedings of the IEEE  
214 International Conference on Computer Vision*, 2017, pp. 2961–2969.
- 215 [14] J. Dai, Y. Li, K. He, and J. Sun, “R-fcn: Object detection via region-based fully convolu-  
216 tional networks,” in *Proceedings of the 30th International Conference on Neural Information  
217 Processing Systems*, 2016, pp. 379–387.
- 218 [15] W. Liu, D. Anguelov, D. Erhan, C. Szegedy, S. Reed, C.-Y. Fu, and A. C. Berg, “Ssd: Single  
219 shot multibox detector,” in *European Conference on Computer Vision*, 2016, pp. 21–37.
- 220 [16] T.-Y. Lin, P. Goyal, R. Girshick, K. He, and P. Dollár, “Focal loss for dense object detection,” in  
221 *Proceedings of the IEEE International Conference on Computer Vision*, 2017, pp. 2980–2988.
- 222 [17] Z. Tian, C. Shen, H. Chen, and T. He, “Fcos: Fully convolutional one-stage object detection,”  
223 in *Proceedings of the IEEE/CVF International Conference on Computer Vision*, 2019, pp.  
224 9627–9636.
- 225 [18] S. Minaee, Y. Y. Boykov, F. Porikli, A. J. Plaza, N. Kehtarnavaz, and D. Terzopoulos, “Image  
226 segmentation using deep learning: A survey,” *IEEE Transactions on Pattern Analysis and  
227 Machine Intelligence*, 2021.
- 228 [19] S. Ghosh, N. Das, I. Das, and U. Maulik, “Understanding deep learning techniques for image  
229 segmentation,” *ACM Computing Surveys (CSUR)*, vol. 52, no. 4, pp. 1–35, 2019.
- 230 [20] L.-C. Chen, G. Papandreou, I. Kokkinos, K. Murphy, and A. L. Yuille, “Deeplab: Semantic  
231 image segmentation with deep convolutional nets, atrous convolution, and fully connected crfs,”  
232 *IEEE Transactions on Pattern Analysis and Machine Intelligence*, vol. 40, no. 4, pp. 834–848,  
233 2017.
- 234 [21] H. Zhao, J. Shi, X. Qi, X. Wang, and J. Jia, “Pyramid scene parsing network,” in *Proceedings of  
235 the IEEE Conference on Computer Vision and Pattern Recognition*, 2017, pp. 2881–2890.
- 236 [22] A. M. Hafiz and G. M. Bhat, “A survey on instance segmentation: state of the art,” *International  
237 Journal of Multimedia Information Retrieval*, vol. 9, no. 3, pp. 171–189, 2020.
- 238 [23] A. Kirillov, R. Girshick, K. He, and P. Dollár, “Panoptic feature pyramid networks,” in *Pro-  
239 ceedings of the IEEE/CVF Conference on Computer Vision and Pattern Recognition*, 2019, pp.  
240 6399–6408.
- 241 [24] Y. Xiong, R. Liao, H. Zhao, R. Hu, M. Bai, E. Yumer, and R. Urtasun, “Upsnet: A unified  
242 panoptic segmentation network,” in *Proceedings of the IEEE/CVF Conference on Computer  
243 Vision and Pattern Recognition*, 2019, pp. 8818–8826.
- 244 [25] Z. Li, W. Wang, E. Xie, Z. Yu, A. Anandkumar, J. M. Alvarez, T. Lu, and P. Luo, “Panoptic  
245 segformer,” *arXiv preprint arXiv:2109.03814*, 2021.
